# Supplementary material for: Construction, mechanism, and antibacterial resistance insight into polypeptide-based nanoparticles
Source: Royal Society of Chemistry journal article supplement (doi:10.1039/c9bm01050e), 2019-01-01
Supplement: c9bm01050e1.pdf [file c9bm01050e1.pdf]

Supporting Information

**Construction, mechanism and antibacterial resistance insight of the polypeptide-based nanoparticles**

Jian-Bin Zhen, Mu-Han Zhao, Ying Ge, Ya Liu, Li-Wei Xu, Cheng Chen, Yong-Kuan Gong and Ke-Wu Yang\*

Key Laboratory of Synthetic and Natural Functional Molecule Chemistry of Ministry of Education,  
Chemical Biology Innovation Laboratory, College of Chemistry and Materials Science, Northwest  
University, 1 Xuefu Avenue, Xi'an 710127, P. R. China.

Corresponding author: Prof. Ke-Wu Yang

E-mail address: kwyang@nwu.edu.cn.

## Characterization

**Proton Nuclear Magnetic Resonance ( $^1\text{H}$  NMR).** The NMR spectra were recorded on a Bruker AV 400 MHz spectrometer, using tetramethylsilane as an internal standard and DMSO- $d_6$ ,  $\text{CDCl}_3$ , or  $\text{D}_2\text{O}$  as solvent.

**DLS Study.** Measurement of particle size Distribution Polymer Micellar solution was carried out by dynamic light scattering apparatus (DLS) on a Malvern Zetasizer Nano-ZS at a fixed scattering angle of  $90^\circ$ . The micellar solution was centrifuged for 10 min at 5000 rpm to remove the insoluble particles and measured with polymer concentration of 1mg/mL for sample preparation.

**Scanning Electron Microscopy (SEM).** The morphologies of micelle and bacteria were observed utilizing scanning electronic microscope (SEM). To obtain SEM images of p2, a drop of solution was spread on a silicon wafer and dried. For bacterial cells were incubated at  $37^\circ\text{C}$  to the mid log growth phase ( $\text{OD}_{600}=0.4\sim 0.6$ ), and then treated with p2 at  $2\times\text{MIC}$  for 3 h. The treated bacteria was collected, washed with PBS and fixed with 2.5% (v/v) glutaraldehyde for 2-4 h, then washed again with PBS and distilled water, respectively. After dehydrating by 30, 50, 70, 90 and 100% ethanol and then replacing with tertiary butyl alcohol, which was dripped on the silicon wafer and freeze-dried. Samples were treated with gold before observation.

**GPC.** The molecular weight and polydispersity index of polymers were determined on a Water 1515 gel permeation chromatography (GPC) instrument equipped with two Plgel 5 mm Mixed-D column. THF or DMF was used the eluent with a flow rate of 1 mL/min, and the polystyrene as standard was used for column calibration. The polymers was centrifuged and filtered prior to experiments.

**Zeta potential.** Zeta potential studies was measured on a Water Nano-ZS 90 Nanosizer (Malvern Instrument) at a fixed scattering angle of  $90^\circ$  at room temperature.

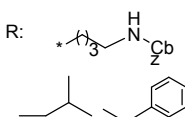

Scheme S1. Synthetic routes of the monomer NCAs.

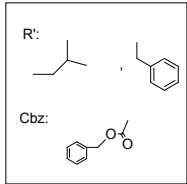

Scheme S2. Synthetic route of the liner polymers.

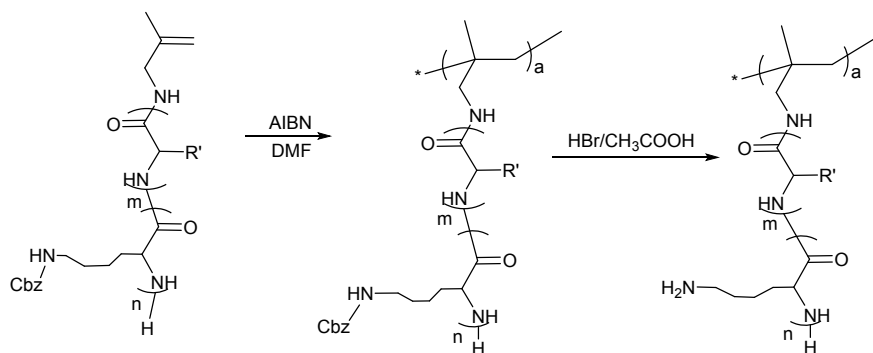

Scheme S3. Synthetic route of the pectinate polymers

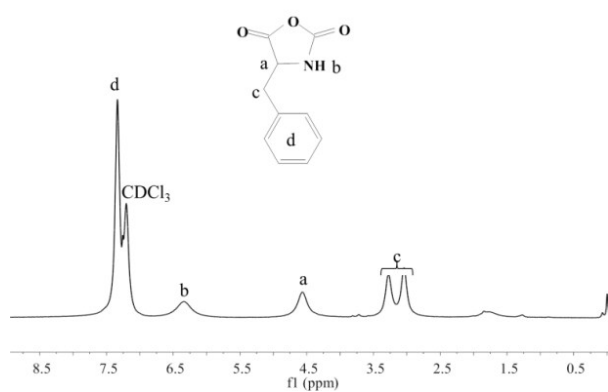

Figure S1.  $^1\text{H}$  NMR spectrum of Phe-NCA in  $\text{CDCl}_3$ .

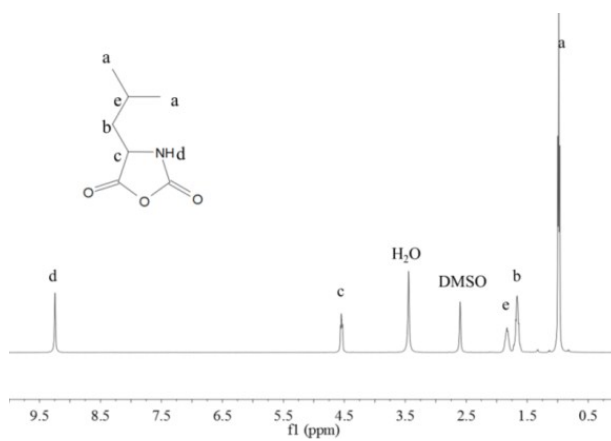

Figure S2.  $^1\text{H}$  NMR spectrum of Leu-NCA in  $\text{DMSO-d}_6$ .

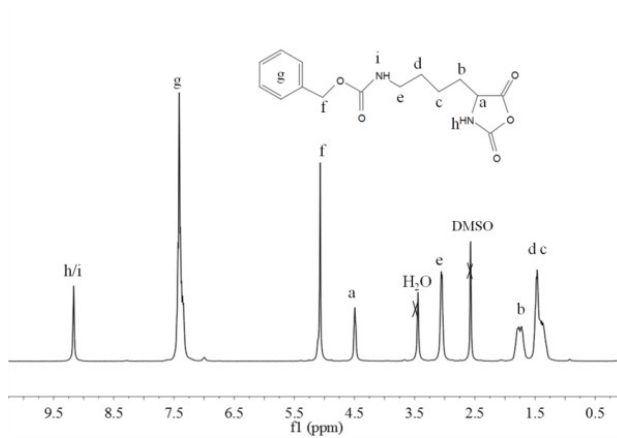

Figure S3.  $^1\text{H}$  NMR spectrum of Z-Lys-NCA in  $\text{DMSO-d}_6$ .

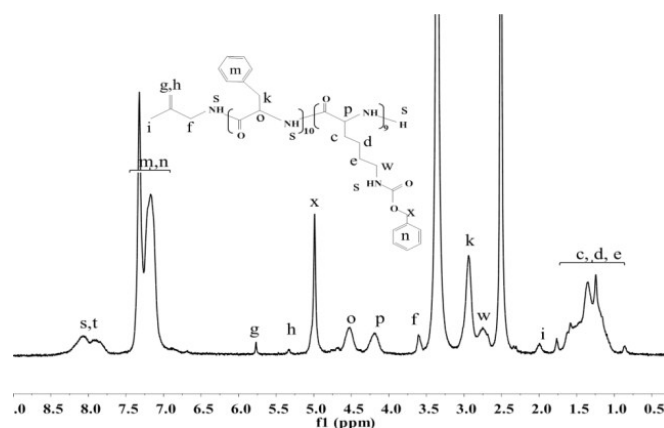

Figure S4.  $^1\text{H}$  NMR spectrum of polymer 1 in  $\text{DMSO-d}_6$

Determination of the composition of polymer 1:

Table S1. The integrals of different characteristic peaks

| Spectrum  | $A(m+n)$ | $A(g+h)$ | $Ax$  |
|-----------|----------|----------|-------|
| Figure S4 | 94.78    | 2        | 17.43 |

The integral area of peak was set to be 2 as the internal reference, corresponding to the amount of the alkenyl hydrogen of initiator. The DP of polymer was determined as the following:

$$\text{DP} = \frac{Am + n}{Ag + h} \times \frac{2}{5} = 18.9 \approx 19$$

$$\text{DP of lysine} = \frac{Ax}{Ag + h} = 8.71 \approx 9$$

$$\text{DP of phenylalanine} = 19 - 9 = 10$$

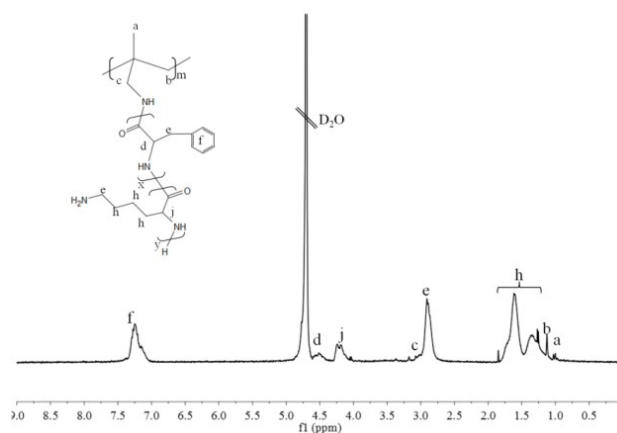

Figure S5.  $^1\text{H}$  NMR spectrum of polymer 2 in  $\text{D}_2\text{O}$

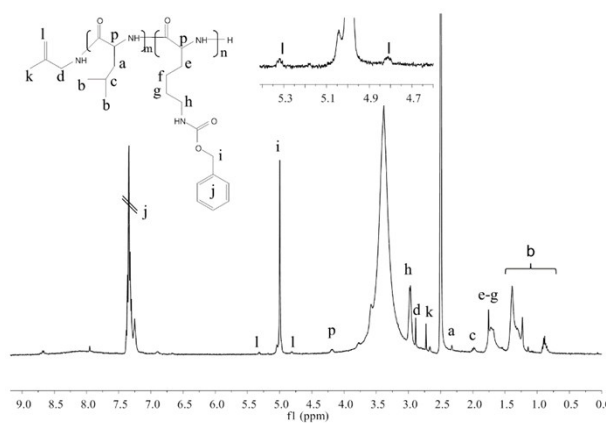

Figure S6.  $^1\text{H}$  NMR spectrum of polymer 3 in  $\text{DMSO-d}_6$

Determination of the composition of polymer 3

Table S2. The integrals of different Characteristic peaks

| Spectrum  | Ai    | Al | Ab    |
|-----------|-------|----|-------|
| Figure S6 | 18.02 | 2  | 49.25 |

The integral area of peak was set to be 2 as the internal reference, corresponding to the amount of the alkenyl hydrogen of initiator. The DP of polymer was determined as the following:

$$\text{DP of leucine} = \frac{Ai}{Al} \times \frac{2}{2} = 9.01 \approx 9$$

$$\text{DP of phenylalanine} = \frac{Ab}{Al} \times \frac{2}{6} = 8.2 \approx 8$$

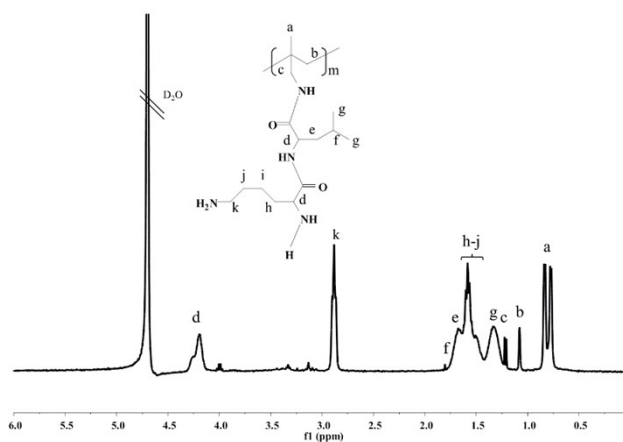

Figure S7.  $^1\text{H}$  NMR spectrum of p4 in  $\text{D}_2\text{O}$

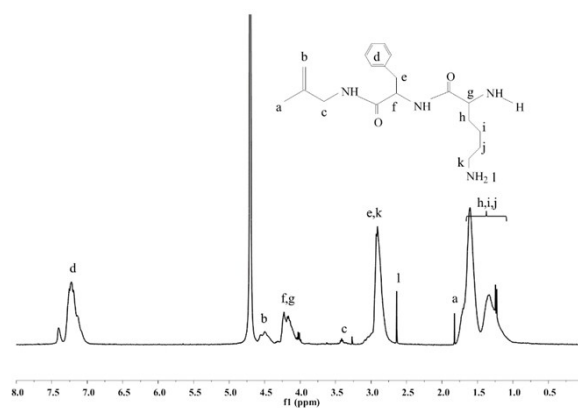

Figure S8.  $^1\text{H}$  NMR spectrum of p5 in  $\text{D}_2\text{O}$

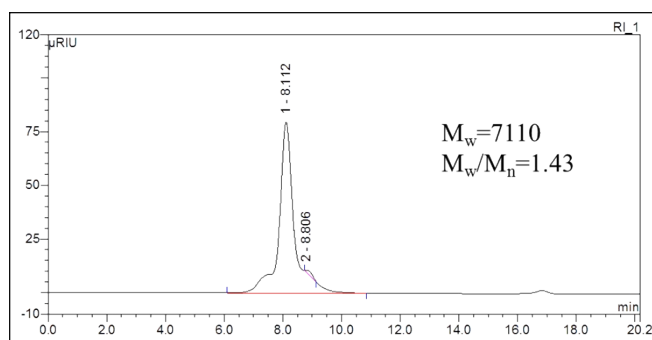

Figure S9. The GPC trace of p2.

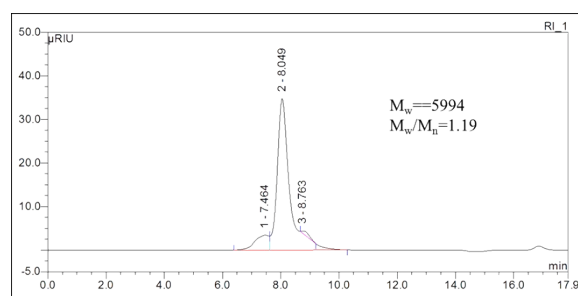

Figure S10. The GPC trace of p4.

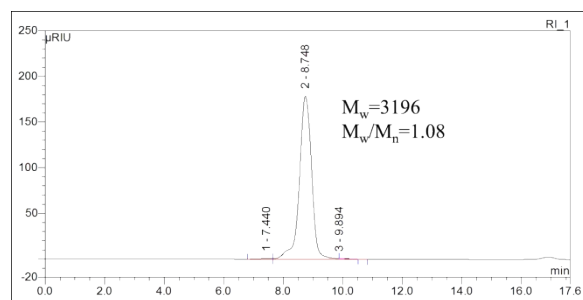

Figure S11. The GPC trace of p5.

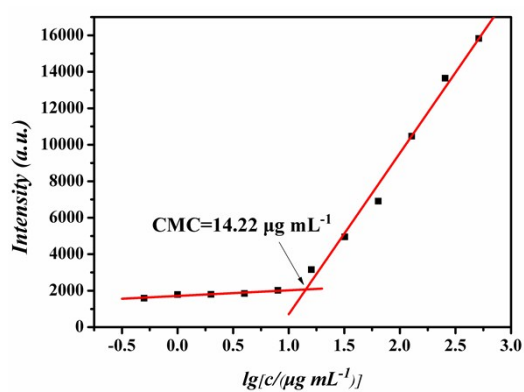

Figure S12. Determination of the critical micellization concentration of p4

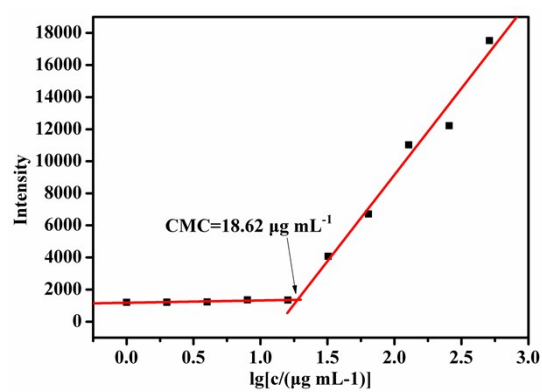

Figure S13. Determination of the critical micellization concentration of p5

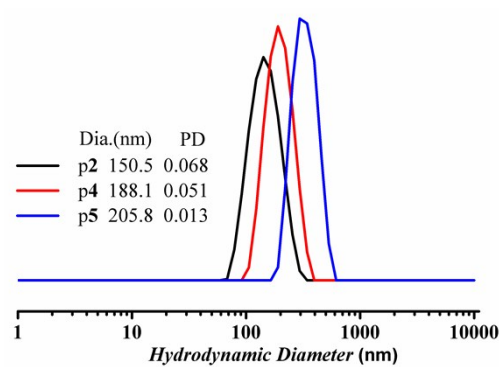

Figure S14. DLS studies of different copolymers nanoparticles (by intensity).

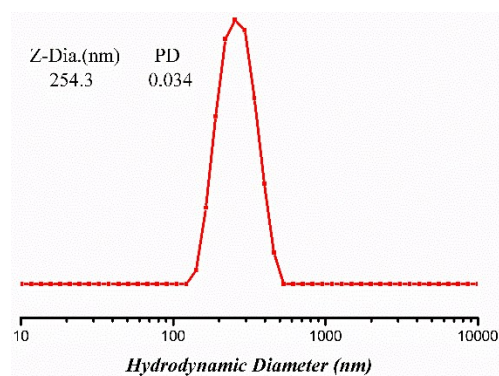

Figure S15. DLS studies of different copolymers nanoparticles (by intensity) in MH.

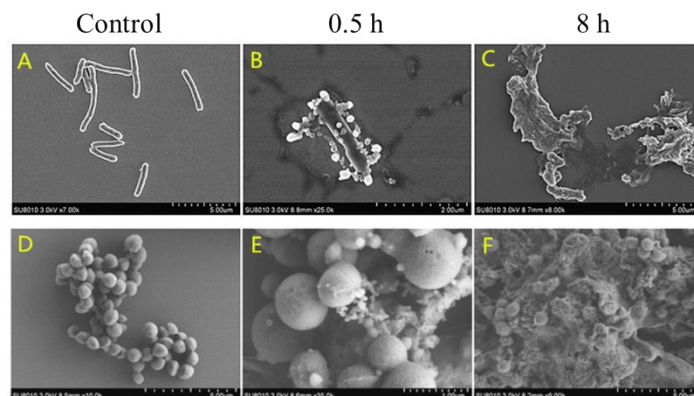

Figure S16. SEM images of *P. aeruginosa* (A-C) and MRSA (ATCC43300) (D-F) before and after treatment with assembled p2.

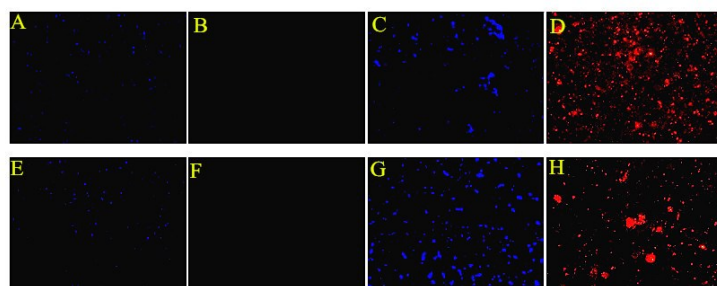

Figure S17. Fluorescence micrographs of MRSA (ATCC43300) (A-C) and *P. aeruginosa* (A-C).

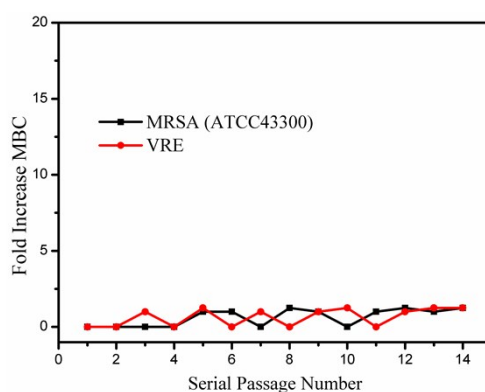

Figure S18. Resistance acquisition of MRSA (ATCC43300) and VRE in the presence of sub-MIC levels of assembled p2.

Table S3. Zeta potentials of three copolymer nanoparticles in aqueous solution at room temperature.

| Polymer micelles   | p5    | p4    | p2    |
|--------------------|-------|-------|-------|
| Zeta potential(mV) | +13.5 | +21.6 | +29.7 |

Table S4. Numerical  $\Delta\mu$ RIU values of p2 with different concentrations on different bacterial cells.

| Concentrations<br>(mg/mL) | $\Delta\mu$ RIU $\pm$ 5     |                      |
|---------------------------|-----------------------------|----------------------|
|                           | <i>S.aureus</i> (ATCC29213) | <i>E.coli</i> (BL21) |
|                           | p 2                         |                      |
| 20                        | 3180.52                     | 2183.71              |
| 5                         | 1675.37                     | 1595.99              |
| 1                         | 927.82                      | 621.32               |
| 0.2                       | 463.84                      | 457.98               |
| 0.1                       | 286.32                      | 271.60               |
| 0.05                      | 219.83                      | 207.14               |

Table S5. Numerical  $\Delta\mu\text{RIU}$  values of p2, p4 and Imipenem on different bacterial cells

| Compound(0.2 mg/mL) | $\Delta\mu\text{RIU} \pm 5$  |                       |
|---------------------|------------------------------|-----------------------|
|                     | <i>S. aureus</i> (ATCC29213) | <i>E. coli</i> (BL21) |
| p4                  | 320.33                       | 97.83                 |
| p2                  | 463.84                       | 457.98                |
| Imipenem            | 7.95                         | 4.31                  |
